# Supplementary material for: Differentiation of regions with atypical oligonucleotide composition in bacterial genomes
Source: Springer Nature journal article supplement (doi:10.1186/1471-2105-6-251), 2005-10-14

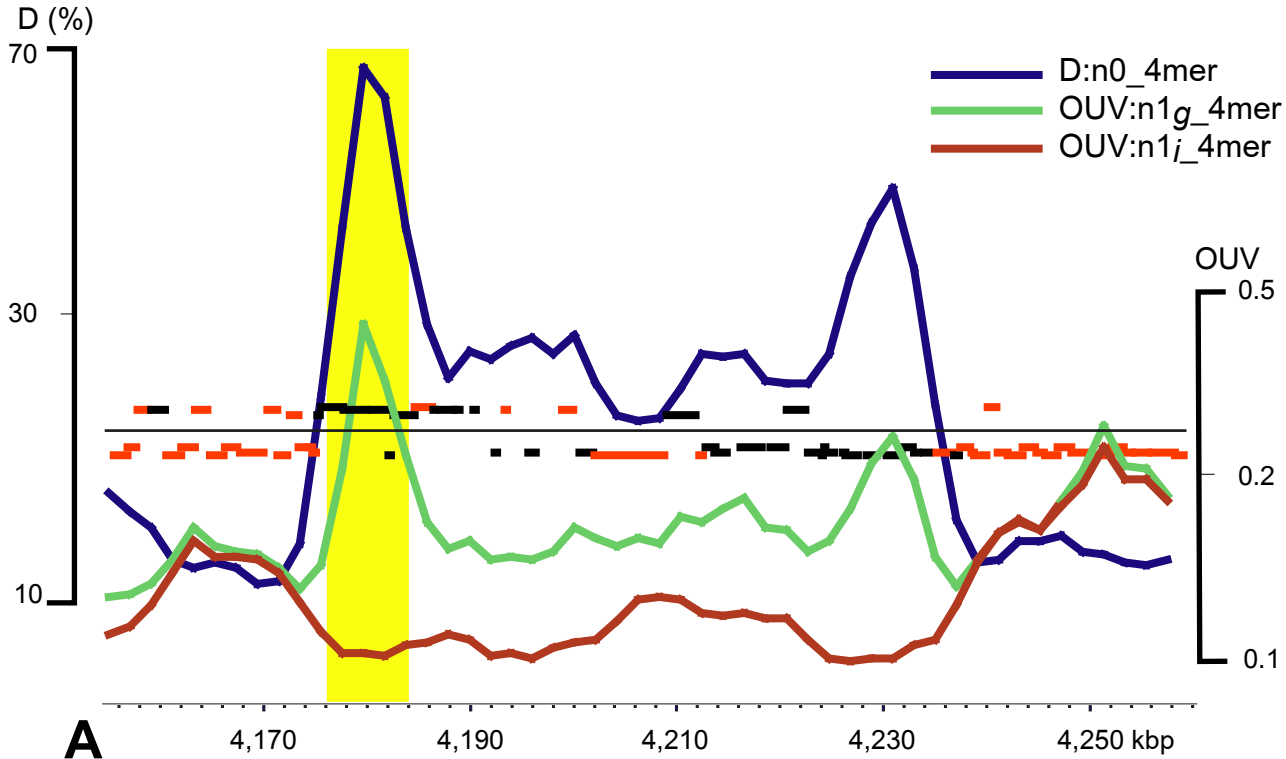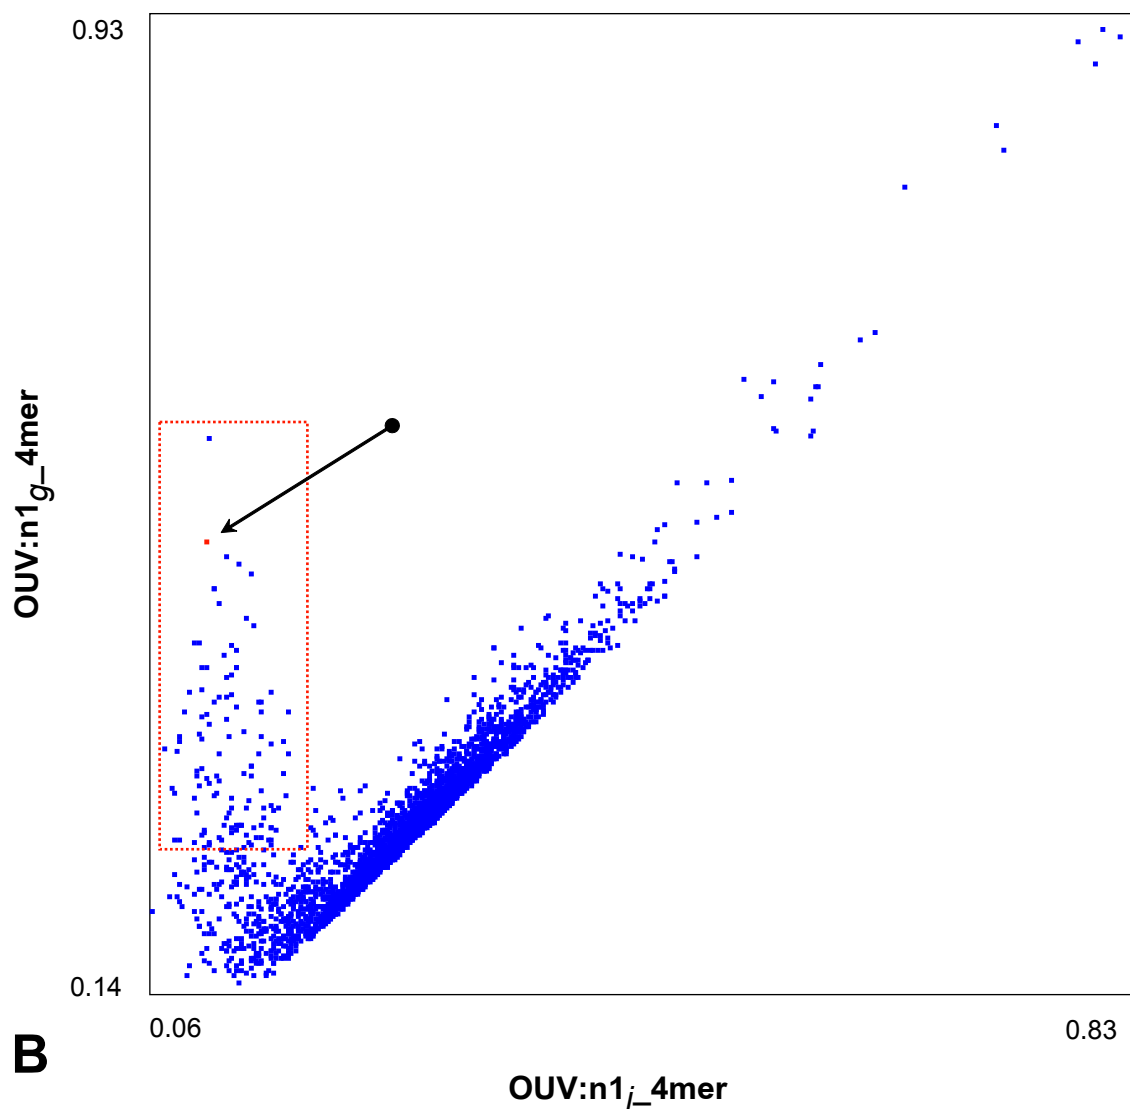

Supplement: 12859_2005_576_MOESM6_ESM.pdf [file 12859_2005_576_MOESM6_ESM.pdf]
